# Preoperative coronary calcium score is predictive of early postoperative cardiovascular complications in liver transplant recipients

Y.-G. Kong<sup>1†</sup>, J.-W. Kang<sup>2†</sup>, Y.-K. Kim<sup>1\*</sup>, H. Seo<sup>1</sup>, T.-H. Lim<sup>2</sup>, S. Hwang<sup>3</sup>, G.-S. Hwang<sup>1</sup> and S.-G. Lee<sup>3</sup>

<sup>1</sup> Department of Anesthesiology and Pain Medicine, <sup>2</sup> Department of Radiology and <sup>3</sup> Division of Hepatobiliary Surgery and Liver Transplantation, Department of Surgery, Asan Medical Center, University of Ulsan College of Medicine, Seoul, Korea

\* Corresponding author: E-mail: kyk@amc.seoul.kr

## Editor's key points

- Patients undergoing liver transplantation have a high incidence of coronary artery disease and cardiovascular complications are common.
- In this retrospective study, a high coronary calcium score determined by coronary CT was associated with cardiovascular complications after liver transplant.
- Prospective data in an external cohort are required to confirm these findings.

**Background.** Coronary computed tomographic angiography (coronary CT) is a non-invasive test for diagnosis of cardiac function. Coronary calcium scores determined by coronary CT are associated with cardiovascular risk factors. However, no studies have investigated the association between coronary calcium scores and cardiovascular complications after liver transplantation (LT). We therefore evaluated the utility of preoperative coronary calcium scores for predicting early postoperative cardiovascular complications in LT recipients.

**Methods.** Between 2010 and 2012, 443 LT recipients were analysed retrospectively. Preoperative cardiovascular assessments, including coronary CT, were performed. A coronary calcium score >400 was defined as a positive finding. Predictive factors of early postoperative cardiovascular complications were evaluated by univariate and multivariate analyses. Major cardiovascular complications occurring during a period of 1 month after LT were noted.

**Results.** Of the 443 patients, 38 (8.6%) experienced one or more cardiovascular complications. Positive coronary CT findings were seen in 11 (2.5%) patients. In the multivariate analysis, a coronary calcium score >400 {odds ratio (OR)=4.62 [95% confidence interval (CI): 1.14–18.72],  $P=0.032$ } and female sex [OR=2.76 (1.37–5.57),  $P=0.005$ ] were predictive of cardiovascular complications.

**Conclusions.** A preoperative coronary calcium score of >400 predicted cardiovascular complications occurring 1 month after LT, suggesting that preoperative evaluation of coronary calcium scores could help predict early postoperative cardiovascular complications in LT recipients.

**Keywords:** coronary CT; early postoperative cardiovascular complications; liver transplantation

Accepted for publication: 11 August 2014

Liver transplantation (LT) is the curative therapy for patients with advanced liver disease.<sup>1</sup> Cardiovascular complications are a leading cause of death after LT. The reported incidence of cardiovascular complications after LT ranges from 25 to 70%, and these complications are regarded as a major cause of postoperative morbidity and mortality in LT recipients.<sup>2–4</sup> Furthermore, LT recipients are at high risk of cardiac diseases such as coronary artery disease (CAD).<sup>5</sup> Therefore, accurate preoperative cardiac examinations should be performed to prevent postoperative cardiovascular complications. However, the optimal method to evaluate such cardiovascular risks in LT recipients remains controversial.<sup>6,7</sup>

A preoperative cardiac evaluation includes electrocardiography (ECG), echocardiography, and thallium single photon emission computed tomography (thallium SPECT).<sup>6,7</sup> Generally, when an abnormal finding is detected using these methods,

a further investigation using coronary angiography (CAG) can be performed. However, preoperative cardiac evaluations such as ECG, echocardiography, and thallium SPECT cannot be effective because of their relatively low sensitivity to detect CAD in LT recipients.<sup>8,9</sup> In contrast with these evaluating tools, CAG was identified as a good diagnostic and preventive modality with reduction of overall all-cause mortality and also the incidence of both fatal and non-fatal myocardial infarction in LT recipients.<sup>10</sup> Nevertheless, CAG may not be an appropriate screening test for patients with relatively advanced liver diseases, because coagulation abnormalities can increase the risk of bleeding during CAG.<sup>11</sup>

To address the aforementioned drawbacks, coronary computed tomographic angiography (coronary CT) has been suggested as a non-invasive imaging test for diagnosis of cardiac function, because it has the advantage of being able to identify

<sup>†</sup> Both authors contributed equally to this work.

coronary vessel wall characteristics and stenosis.<sup>12</sup> Coronary calcium scores, obtained from coronary CT, are a particularly useful determinant of the prevalence of CAD in LT candidates.<sup>13</sup> Several previous studies report a significant correlation between coronary calcium scores and known cardiovascular risk factors in LT recipients.<sup>14–15</sup> In addition, a coronary calcium score of  $>400$  is significantly associated with CAD on CAG in LT recipients.<sup>16–18</sup> However, no studies have investigated the association between coronary calcium scores and cardiovascular complications after LT.

We therefore evaluated the usefulness of preoperative coronary calcium scores assessed by coronary CT for predicting early postoperative cardiovascular complications in LT recipients. To this end, we evaluated the ability of a coronary calcium score of  $>400$  to predict major cardiovascular complications occurring within 1 month of LT.

## Methods

### Patients

This was a single-centre, retrospective observational study of 443 patients who underwent LT at Asan Medical Center, Seoul, Korea, between 2010 and 2012. The following groups of patients were excluded from the study: (i) patients under 20 years of age, (ii) patients who did not undergo coronary CT before LT, (iii) patients who suffered significant cardiovascular events such as a myocardial infarction, or had a history of coronary angioplasty before LT, and (iv) patients who did not check troponin I assay in the postoperative period (Fig. 1). Medical records were reviewed and cardiovascular complications that occurred within 1 month of the LT were noted. The study protocol was approved by the Institutional Review Board of Asan Medical Center.

### Routine cardiac evaluation

In our institution, routine preoperative cardiac assessments consist of an ECG, echocardiography, and thallium SPECT. On echocardiography, the presence of decreased left ventricle function (decreased ejection fraction), regional wall motion abnormality, significant valvular disease, or pulmonary hypertension

were categorized as abnormal findings. On thallium SPECT, the presence of a medium or large wall perfusion defect was regarded as an abnormal finding. Preoperative ECG and corrected QT (QTc) interval were also evaluated.

### Coronary CT

Coronary CT scans using dual-source CTs (Somatom® Definition Flash or Somatom® Definition, Siemens Medical Solutions, Forchheim, Germany) were performed as part of the routine cardiac evaluations (Fig. 2). Coronary calcium scores were calculated with an automated, computerized software program using an Agatston scoring method.<sup>19</sup>

Total coronary artery calcification was classified as none (0), minimal (1–10), mild (11–100), moderate (101–400), or severe ( $>400$ ) according to the total coronary calcium score.<sup>20</sup> In the present study, patients with a coronary calcium score  $>400$  were assigned to a positive coronary CT group, while patients with a coronary calcium score  $\leq 400$  were assigned to the negative coronary CT group.<sup>16–18</sup>

### Coronary angiography

Invasive CAG was performed to identify significant CAD in the positive coronary CT group before LT. The presence of significant stenosis in at least one coronary artery was regarded as a positive finding. However, based on the physician's assessment, some patients with severe coagulopathy did not undergo invasive CAG because of the risk of bleeding.

### Posttransplant follow-up

In our institution, the combination of two or three different maintenance immunosuppressive drugs is used for the prevention of rejection after operation. The i.v. calcineurin inhibitors (tacrolimus and cyclosporine) are mainly used during hospital stay. Steroid such as methylprednisolone is almost universally used. Most recipients are also discharged with the oral tacrolimus as a primary immunosuppressant, with steroids which are gradually tapered and weaned in the following months. In addition, mycophenolate mofetil such as azathioprine is also commonly used to reduce tacrolimus dose and

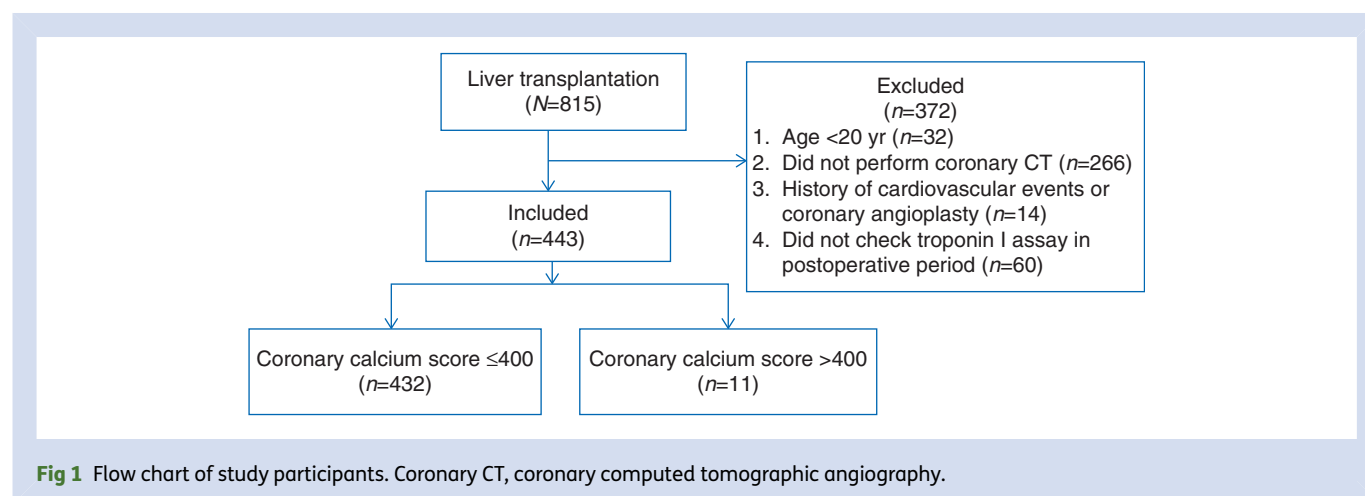

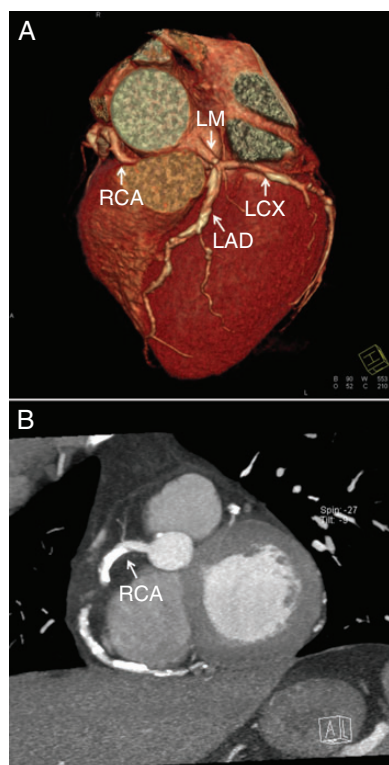

**Fig 2** Multiple calcified plaques present on the coronary arteries of a liver transplant recipient, as shown by coronary computed tomographic angiography (A: short-axis view; B: volume-rendered image). The total coronary calcium score is 2601 in this patient [right coronary artery (RCA): 1611; left anterior descending coronary artery (LAD): 746; left circumflex coronary artery (LCX): 228; left main coronary artery (LM): 16].

side-effects such as nephrotoxicity, hypertension, and hyperlipidaemia.<sup>21</sup> Smoking was strictly prohibited after LT. For LT recipients showing serum total cholesterol  $>240$  mg dl<sup>-1</sup> or suboptimal lipid profiles with other risk factors for CAD, various statin agents were administered.

### Data collection

All cardiovascular complications that occurred within 1 month of the LT were recorded. Records from the general ward and intensive care units, which were available on computerized databases, were analysed. Potential risk factors of postoperative cardiovascular complications included age, sex, BMI, diabetes mellitus, smoking history, statins therapy, diuretics use, QT<sub>c</sub> interval, Child-Turcotte-Pugh (CTP) score, Model of End-Stage Liver Disease (MELD) score, graft weight, graft ischaemic time, and operation type (single living donor, dual living donor, or cadaveric donor).

### Clinical endpoints

The main clinical endpoint was to evaluate whether a calcium score of  $>400$  in coronary CT could predict the occurrence of cardiovascular complications occurring within 1 month of

the LT. Postoperative cardiovascular complications were assessed according to the following definitions: a non-fatal myocardial infarction (medical records, ECG findings, and elevated troponin I  $>0.2$  ng ml<sup>-1</sup>), serious arrhythmia (ventricular tachycardia, ventricular fibrillation, or heart block requiring treatment), and cardiac death (because of fatal myocardial infarction or heart failure).<sup>22</sup>

### Statistical analysis

Liver transplant recipients were categorized into two groups: the cardiovascular complications group (recipients with early postoperative cardiovascular complications) and the no cardiovascular complications group (recipients without complications). Categorical data are presented as a number (percentage) and were compared using the chi-square test or Fisher's exact test as appropriate. Continuous data are expressed as the mean (sd) or median (interquartile range) and were compared using a *t*-test or Mann-Whitney *U*-test as appropriate. Factors were input as independent variables into univariate logistic regression analysis. Variables with a *P*-value of  $<0.1$  on the univariate logistic regression analysis were included in a stepwise multivariate logistic regression analysis to evaluate variables that independently predict major cardiovascular complications 1 month after LT. A *P*-value of  $<0.05$  was considered statistically significant. All statistical analyses were performed using SPSS for Windows (version 18.0, SPSS, Inc., Chicago, IL, USA).

### Results

Of the 815 patients who underwent LT during the study period, 443 patients were included in the study (Fig. 1). Patient characteristic data including coronary calcium score are listed in Table 1. Coronary CT was performed on all 443 patients with no complications. The total mean coronary calcium score was 42 (195), and 319 (72%), 27 (6%), 61 (14%), 25 (5.5%), and 11 (2.5%) patients were categorized into the no, minimal, mild, moderate, or severe calcification groups, respectively. Figure 2 shows a coronary CT from a liver transplant recipient with multiple calcified coronary artery plaques.

Of the 443 patients in the study population, 432 (97.5%) had a coronary calcium score of  $\leq 400$ , and were therefore assigned to the negative coronary CT group (Fig. 1). Positive findings on the coronary CT (classified as a coronary calcium score of  $>400$ ) were seen in 11 (2.5%) patients; of which, 3 underwent CAG. These 3 patients all showed significant stenosis in at least one coronary artery. The first patient had the stenosis at left anterior descending coronary artery (LAD) and right coronary artery (RCA) in coronary CT and thus CAG was performed. In CAG, diffuse stenosis at LAD was observed in the patient. LT was performed after the application of medical treatment. On the sixteenth day after the operation, the patient was diagnosed with paroxysmal atrial fibrillation, requiring another medical treatment. The patient expired in 60 days as a result of unknown cardiac arrest. The second patient had stenosis at LAD and left circumflex coronary artery (LCX) in coronary CT, while stenosis at LAD was observed in CAG. LT was

**Table 1** Patient characteristics of 443 liver transplant recipients. Data are expressed as the mean (SD) or number (percentage) as appropriate

| Variables                                    | Value                         |
|----------------------------------------------|-------------------------------|
| Age (yr)                                     | 52.4 (7.7)                    |
| Gender (male/female)                         | 349 (79%)/94 (21%)            |
| BMI (kg m <sup>-2</sup> )                    | 23.9 (3.7)                    |
| Diabetes mellitus                            | 106 (24%)                     |
| Smoking history                              | 144 (33%)                     |
| Statins therapy                              | 6 (1%)                        |
| Underlying liver disease                     |                               |
| Hepatitis B virus related liver cirrhosis    | 315 (71%)                     |
| Hepatitis C virus related liver cirrhosis    | 24 (6%)                       |
| Alcoholic liver disease                      | 64 (15%)                      |
| Non-B Non-C hepatitis                        | 18 (4%)                       |
| Toxic hepatitis                              | 6 (1%)                        |
| Biliary cirrhosis                            | 6 (1%)                        |
| Others                                       | 10 (2%)                       |
| Severity of liver disease                    |                               |
| Child-Turcotte-Pugh score (A/B/C)            | 150 (34%)/174 (39%)/119 (27%) |
| Model for End-Stage Liver Disease score      | 15.0 (8.2)                    |
| Preoperative haematologic profiles           |                               |
| Haemoglobin (g dl <sup>-1</sup> )            | 11.0 (2.2)                    |
| Platelet (10 <sup>3</sup> mm <sup>-3</sup> ) | 71.7 (50.8)                   |
| Prothrombin time (INR)                       | 1.5 (0.5)                     |
| Albumin (g dl <sup>-1</sup> )                | 3.2 (0.6)                     |
| Creatinine (mg dl <sup>-1</sup> )            | 1.01 (1.00)                   |
| Coronary calcium score                       | 42 (195)                      |
| No (0)                                       | 319 (72%)                     |
| Minimal (1–10)                               | 27 (6%)                       |
| Mild (11–100)                                | 61 (14%)                      |
| Moderate (101–400)                           | 25 (5.5%)                     |
| Severe (>400)                                | 11 (2.5%)                     |

performed after medical treatment, and no postoperative cardiovascular events were found. The third patient had stenosis at LAD, LCX, and RCA in coronary CT. Although the patient was observed with three-vessel disease in CAG, LT was performed after only medical treatment. No postoperative cardiovascular complications were determined. The remaining 8 of 11 patients did not undergo CAG and were solely treated with medications before LT mainly because of their abnormal coagulation function.

All patients underwent ECG and echocardiography before LT. On echocardiography, 31 (7.0%) patients had abnormal findings. On ECG, the mean QT<sub>c</sub> interval was 449.0 (34.1) ms. Thallium SPECT was performed on 410 (92.5%) patients, and a wall perfusion defect was detected in only three (0.7%) patients. Routine cardiac evaluations such as ECG, echocardiography, and thallium SPECT did not predict early postoperative cardiovascular complications in LT recipients. A

comparison of the clinical characteristics of LT recipients listed according to the development of cardiovascular complications 1 month after LT is shown in Table 2. In the univariate logistic regression analysis, the following factors were significantly associated with early postoperative cardiovascular complications: a coronary calcium score >400, female sex, and statins therapy (Table 3). In the multivariate logistic regression analysis, predictive factors of major cardiovascular complications after LT were a coronary calcium score >400 and female sex. The risk of cardiovascular complications in LT recipients with a coronary calcium score >400 was 4.62 times that of LT recipients with a coronary calcium score ≤400 (*P*=0.032; Table 3).

Of the 443 LT recipients, 38 (8.6%) patients developed one or more cardiovascular complications during the 1 month follow-up period. Notably, 24 of the 38 patients experienced a non-fatal myocardial infarction, and 17 patients showed serious arrhythmia requiring immediate treatment. In addition, three of the 38 patients died as a result of cardiovascular complications.

Discussion

The major finding in the present study is that a coronary calcium score of >400 and female sex are useful determinants for predicting early postoperative cardiovascular complications in LT recipients. Cardiovascular complications occur frequently after LT, and an increased incidence of CAD has been consistently reported in patients with end-stage liver disease.<sup>2–4</sup> For these reasons, cardiovascular morbidity and mortality are major concerns in patients undergoing LT. It is therefore very important to predict postoperative cardiovascular complications in LT recipients.<sup>23</sup>

Coronary calcium scores are effective for detecting CAD.<sup>24–26</sup> Calcification of the coronary artery is caused by calcium phosphate, which accumulates in the form of hydroxyapatite. Its formation in atherosclerotic plaques is similar to bone mineralization. Coronary calcium scores are therefore related to measures of coronary luminal narrowing, stenosis severity, and total plaque burden. In addition, the coronary calcium score, which is used as a strong diagnostic determinant of CAD, may be a predictive factor of cardiovascular events in patients without cardiac symptoms because of its high negative predictive value and its independence from traditional coronary risk factors.<sup>27</sup>

A negative or extremely low coronary calcium score (10 or lower) indicates the absence of a significant coronary obstructive lesion. Thus, no specific further cardiac work-up is required for such patients. A coronary calcium score of 11 to 400 is consistent with mild or moderate atherosclerotic plaque burden, and suggests mild or moderate obstructive coronary artery stenosis.<sup>27 28</sup> Importantly, patients with a coronary calcium score >400 are at a high likelihood of at least one significant coronary artery stenosis.<sup>16–18</sup>

In the present study, 11 (2.5%) of the 443 of the patients had a coronary calcium score >400. In the multivariate logistic regression analysis, a coronary calcium score >400 was a significant factor for predicting early cardiovascular complications



**Table 2** Clinical characteristics of liver transplant recipients according to the development of postoperative cardiovascular complications. Data are expressed as the mean (SD), median (interquartile range), or number (percentage) as appropriate. Thallium SPECT, thallium single photon emission computed tomography; QT<sub>c</sub>, corrected QT interval on ECG; MELD, Model for End-Stage Liver Disease

| Variables                             | No complications (n = 405) | Complications (n = 38) | P-value |
|---------------------------------------|----------------------------|------------------------|---------|
| Coronary calcium score >400           | 8 (2.0%)                   | 3 (7.9%)               | 0.059   |
| Thallium SPECT                        | 3 (0.9%)                   | 0 (0%)                 | 1.000   |
| Echocardiography                      | 29 (7.2%)                  | 2 (5.3%)               | 1.000   |
| Age (yr)                              | 52.4 (7.5)                 | 52.2 (9.8)             | 0.894   |
| Gender (male/female)                  | 326 (80.5%)/79 (19.5%)     | 23 (60.5%)/15 (39.5%)  | 0.004   |
| Body mass index (kg m <sup>-2</sup> ) | 23.9 (3.7)                 | 23.4 (4.2)             | 0.433   |
| Diabetes mellitus                     | 93 (23.0%)                 | 13 (34.2%)             | 0.120   |
| Smoking history                       | 136 (33.6%)                | 8 (21.1%)              | 0.115   |
| Statins therapy                       | 4 (1.0%)                   | 2 (5.3%)               | 0.086   |
| Preoperative diuretics use            | 243 (60.0%)                | 21 (55.3%)             | 0.569   |
| QT <sub>c</sub> (ms)                  | 448.7 (34.3)               | 452.3 (32.1)           | 0.533   |
| Child-Turcotte-Pugh score             | 8.0 (2.3)                  | 8.1 (2.1)              | 0.628   |
| MELD score                            | 15.1 (8.2)                 | 14.5 (8.0)             | 0.678   |
| Graft ischaemic time (min)            | 44.0 (34.0–61.0)           | 44.5 (37.0–64.0)       | 0.526   |
| Graft weight (g)                      | 730.0 (650.0–830.0)        | 738.0 (680.0–810.0)    | 0.610   |
| Donor type                            |                            |                        | 0.774   |
| Cadaveric donor                       | 13 (3.2%)                  | 2 (5.3%)               |         |
| Single living donor                   | 353 (87.2%)                | 33 (86.8%)             |         |
| Dual living donor                     | 39 (9.6%)                  | 3 (7.9%)               |         |

**Table 3** Univariate and multivariate regression analysis associated with cardiovascular complications during the first month after liver transplantation. OR, odds ratio; CI, confidence interval; thallium SPECT, thallium single photon emission computed tomography; QT<sub>c</sub>, corrected QT interval on ECG; MELD, Model for End-Stage Liver Disease

| Variables                   | Univariate analysis |         | Multivariate analysis |         |
|-----------------------------|---------------------|---------|-----------------------|---------|
|                             | OR (95% CI)         | P-value | OR (95% CI)           | P-value |
| Coronary calcium score >400 | 4.25 (1.08–16.76)   | 0.039   | 4.62 (1.14–18.72)     | 0.032   |
| Thallium SPECT              | 0                   | 0.999   |                       |         |
| Echocardiography            | 0.72 (0.17–3.14)    | 0.662   |                       |         |
| Age                         | 1.00 (0.96–1.04)    | 0.867   |                       |         |
| Gender                      |                     |         |                       |         |
| Male                        | 1.00                |         | 1.0                   |         |
| Female                      | 2.69 (1.34–5.39)    | 0.005   | 2.76 (1.37–5.57)      | 0.005   |
| Body mass index             | 0.96 (0.88–1.06)    | 0.432   |                       |         |
| Diabetes mellitus           | 1.75 (0.86–3.55)    | 0.124   |                       |         |
| Smoking history             | 0.53 (0.24–1.18)    | 0.120   |                       |         |
| Statins therapy             | 5.57 (0.99–31.46)   | 0.052   | 4.20 (0.69–25.63)     | 0.120   |
| Preoperative diuretics use  | 0.82 (0.42–1.61)    | 0.570   |                       |         |
| QT <sub>c</sub>             | 1.00 (1.00–1.01)    | 0.531   |                       |         |
| Child-Turcotte-Pugh score   | 1.03 (0.89–1.19)    | 0.725   |                       |         |
| MELD score                  | 1.00 (0.95–1.03)    | 0.664   |                       |         |
| Graft ischaemic time        | 1.12 (0.61–2.07)    | 0.709   |                       |         |
| Graft weight                | 1.00 (1.00–1.00)    | 0.735   |                       |         |
| Donor type                  |                     |         |                       |         |
| Cadaveric donor             | 1.00                |         |                       |         |
| Single living donor         | 0.61 (0.13–2.81)    | 0.524   |                       |         |
| Dual living donor           | 0.50 (0.08–3.33)    | 0.474   |                       |         |

after LT. These data, together with previous reports,<sup>16–18</sup> suggest that a coronary calcium score  $>400$  should be considered as a cardiovascular risk factor when performing preoperative evaluations in LT recipients. In line with the present results, McAvoy and colleagues<sup>14</sup> reported a significant relationship between coronary calcium scores and cardiovascular risk factors such as age, systolic blood pressure, and the number of coronary vessels involved in LT recipients. They also suggested that the coronary calcium score is a more sensitive measure to detect cardiovascular risk factors in LT patients than the Framingham risk score. Jodocy and colleagues<sup>29</sup> also described positive coronary CT findings (with a coronary calcium score  $>300$ ) as a useful non-invasive measure of the prevalence of CAD in LT recipients during a post-transplant follow-up period ranging from 9 to 15 months. In patients with chronic renal failure, the coronary calcium score  $>400$  proved to have good diagnostic and prognostic performance to evaluate cardiovascular events.<sup>30</sup> In patients with asymptomatic diabetes, there was a significant association between coronary calcium score  $>400$  and the prevalence of carotid plaque.<sup>31</sup>

In addition, CAG is known to be an important diagnostic tool for assessing cardiovascular events in LT recipients, although it has the risk of bleeding. Maddur and colleagues<sup>10</sup> reported that the increased use of CAG and percutaneous coronary intervention was associated with significant reductions in postoperative myocardial infarction and 1-yr all-cause mortality and also overall all-cause mortality in LT recipients. Furthermore, they also suggested that the CAG can be recommended to evaluate cardiac risks, when indicated, in LT recipients.

We also found that female sex is a reliable predictive factor for cardiovascular complications after LT. In an earlier study by Rumberger and colleagues,<sup>27</sup> the amount of coronary calcium proportionally corresponded to the degree of overall atherosclerotic plaque burden regardless of sex. However, they reported that the atherosclerotic process, regardless of conventional risk assessment, is more premature, accelerated, and aggressive in women than in men. Importantly, they asserted that when using coronary calcium scoring in clinical applications, the variability of the score as a function of sex must be considered. However, further studies are required to clarify the effect of sex on the prediction of postoperative cardiovascular complications.

Fouad and colleagues<sup>13</sup> showed that cardiac complications after LT are common, and emphasized that adverse intraoperative cardiovascular events, previous cardiac disease, and integrated MELD score are independent predictors of cardiac complications during the 6-month period after LT. However, in the present study, the MELD score was not a significant predictive factor of cardiovascular complications occurring 1 month after LT. The reasons underlying the discrepancy between the present results and previous findings are not clear. Possible factors such as LT donor type (living vs cadaveric donor) and follow-up period after LT (1 vs 6 months) are thought to, at least in part, influence these differences. The relatively low MELD score [15.0 (8.2)] in our patients may also influence the predictive ability of this factor for postoperative cardiovascular complications.

In the present study, other routine cardiac evaluations such as thallium SPECT and echocardiography were not predictive of postoperative cardiovascular complications in LT recipients. At our institution, LT candidates with abnormal thallium or echocardiography findings underwent further cardiac evaluations or were sent to a cardiac specialist. At this point, if additional abnormal findings were found, cardiac interventional procedures or surgical treatment was performed before LT surgery. Therefore, these candidates were excluded from our study, and such patients' treatment procedure likely influenced the results of the study.

There were several limitations to our study, including its retrospective design and the use of medical records from the general ward and intensive care unit. Furthermore, because coronary CT has been performed by clinicians' decision after evaluating the conditions of LT recipients, the coronary CT was not performed in some recipients. Therefore, our retrospective study may be, at least in part, influenced by the inevitable selection bias. Further prospective study would be needed to minimize the selection bias. In addition, the 1-month study period was relatively short. Further studies are therefore needed to assess long-term postoperative cardiovascular complications.

In conclusion, a coronary CT calcium score of  $>400$  and female sex are reliable predictive factors for cardiovascular complications occurring during a period of 1 month after LT. Therefore, these results suggest that the coronary calcium score provides useful information for predicting early postoperative cardiovascular complications in LT recipients. These results also suggest that the coronary CT can be another potentially good screening tool for preoperative cardiovascular evaluation in LT candidates.

## Authors' contributions

Y.-G.K.: study design, data collection, data analysis, manuscript preparation, and revision; J.-W.K.: study design, data analysis, manuscript revision, and final approval; Y.-K.K.: conception, study design, data analysis, manuscript preparation, revision, and final approval; H.S.: study design and data collection; T.-H.L.: manuscript revision and final approval; S.H.: manuscript revision and final approval; G.-S.H.: conception, study design, and final approval; S.-G.L.: manuscript revision and final approval.

## Declaration of interest

None declared.

## References

- 1 Mark SR, Derek CA, Cindy LB, Zdenek V, Lisa W. Survival after liver transplantation in the United States: a disease-specific analysis of the UNOS database. *Liver Transpl* 2004; **10**: 886–97
- 2 Dec GW, Kondo N, Farrell ML, Dienstag J, Cosimi AB, Semigran MJ. Cardiovascular complications following liver transplantation. *Clin Transplant* 1995; **9**: 463–71
- 3 Johnston SD, Morris JK, Cramb R, Gunson BK, Neuberger J. Cardiovascular morbidity and mortality after orthotopic liver transplantation. *Transplantation* 2002; **73**: 901–6

- 4 Therapondos G, Flapan AD, Plevris JN, Hayes PC. Cardiac morbidity and mortality related to orthotopic liver transplantation. *Liver Transpl* 2004; **10**: 1441–53
- 5 Mandell MS, Lindenfeld J, Tsou MY, Zimmerman M. Cardiac evaluation of liver transplant candidates. *World J Gastroenterol* 2008; **14**: 3445–51
- 6 Ali A, Bhardwaj HL, Heuman DM, Jovin IS. Coronary events in patients undergoing orthotopic liver transplantation: perioperative evaluation and management. *Clin Transplant* 2013; **27**: E207–15
- 7 Raval Z, Harinstein ME, Skaro AI, et al. Cardiovascular risk assessment of the liver transplant candidate. *J Am Coll Cardiol* 2011; **58**: 223–31
- 8 Findlay JY, Keegan MT, Pellikka PP, Rosen CB, Plevak DJ. Preoperative dobutamine stress echocardiography, intraoperative events, and intraoperative myocardial injury in liver transplantation. *Transplant Proc* 2005; **37**: 2209–13
- 9 Snipelisky D, Levy M, Shapiro B. Utility of dobutamine stress echocardiography as part of the pre-liver transplant evaluation: an evaluation of its efficacy. *Clin Cardiol* 2014; **37**: 468–72
- 10 Maddur H, Bourdillon PD, Liangpunsakul S, et al. Role of cardiac catheterization and percutaneous coronary intervention in the pre-operative assessment and management of patients before orthotopic liver transplantation. *Liver Transpl* 2014; **20**: 664–72
- 11 Keeffe BG, Valantine H, Keeffe EB. Detection and treatment of coronary artery disease in liver transplant candidates. *Liver Transpl* 2001; **7**: 755–61
- 12 Janne d'Othée B, Siebert U, Cury R, Jadvar H, Dunn EJ, Hoffmann U. A systematic review on diagnostic accuracy of CT-based detection of significant coronary artery disease. *Eur J Radiol* 2008; **65**: 449–61
- 13 Fouad TR, Abdel-Razek WM, Burak KW, Bain VG, Lee SS. Prediction of cardiac complications after liver transplantation. *Transplantation* 2009; **87**: 763–70
- 14 McAvoy NC, Kochar N, McKillop G, Newby DE, Hayes PC. Prevalence of coronary artery calcification in patients undergoing assessment for orthotopic liver transplantation. *Liver Transpl* 2008; **14**: 1725–31
- 15 Chae WY, Hwang S, Yoon YI, et al. Clinical value of preoperative coronary risk assessment by computed tomographic arteriography prior to adult living donor liver transplantation. *Transplant Proc* 2012; **44**: 415–7
- 16 Kemmer N, Case J, Chandna S, Neff GW. The role of coronary calcium score in the risk assessment of liver transplant candidates. *Transplant Proc* 2014; **46**: 230–3
- 17 Shah S, Bellam N, Leipsic J, et al. Prognostic significance of calcified plaque among symptomatic patients with nonobstructive coronary artery disease. *J Nucl Cardiol* 2014; **21**: 453–66
- 18 Pavitt CW, Harron K, Lindsay AC, et al. Deriving coronary artery calcium scores from CT coronary angiography: a proposed algorithm for evaluating stable chest pain. *Int J Cardiovasc Imaging* 2014; **30**: 1135–43
- 19 Agatston AS, Janowitz WR, Hildner FJ, Zusmer NR, Viamonte M, Detrano R. Quantification of coronary artery calcium using ultrafast computed tomography. *J Am Coll Cardiol* 1990; **15**: 827–32
- 20 Rumberger JA, Sheedy PF, Breen JF, Schwartz RS. Coronary calcium, as determined by electron beam computed tomography, and coronary disease on arteriogram. Effect of patient's sex on diagnosis. *Circulation* 1995; **91**: 1363–7
- 21 Moon DB, Lee SG. Liver transplantation. *Gut Liver* 2009; **3**: 145–65
- 22 Safadi A, Homsy M, Maskoun W, et al. Perioperative risk predictors of cardiac outcomes in patients undergoing liver transplantation surgery. *Circulation* 2009; **120**: 1189–94
- 23 Mark TK, David JP. Preoperative assessment of the patient with liver disease. *Am J Gastroenterol* 2005; **100**: 2116–27
- 24 Budoff MJ, Dowe D, Jollis JG, et al. Diagnostic performance of 64-multidetector row coronary computed tomographic angiography for evaluation of coronary artery stenosis in individuals without known coronary artery disease: results from the prospective multicenter ACCURACY (Assessment by Coronary Computed Tomographic Angiography of Individuals Undergoing Invasive Coronary Angiography) trial. *J Am Coll Cardiol* 2008; **52**: 1724–32
- 25 Meijboom WB, Meijjs MFL, Schuijff JD, et al. Diagnostic accuracy of 64-slice computed tomography coronary angiography: a prospective, multicenter, multivendor study. *J Am Coll Cardiol* 2008; **52**: 2135–44
- 26 Cassagneau P, Jacquier A, Giorgi R, et al. Prognostic value of preoperative coronary computed tomography angiography in patients treated by orthotopic liver transplantation. *Eur J Gastroenterol Hepatol* 2012; **24**: 558–62
- 27 Rumberger JA, Brundage BH, Rader DJ, Kondos G. Electron beam computed tomographic coronary calcium scanning: a review and guidelines for use in asymptomatic persons. *Mayo Clin Proc* 1999; **74**: 243–52
- 28 Detrano R, Guerci AD, Carr JJ, et al. Coronary calcium as a predictor of coronary events in four racial or ethnic groups. *N Engl J Med* 2008; **358**: 1336–45
- 29 Jodocy D, Abbrederis S, Graziadei IW, et al. Coronary computer tomographic angiography for preoperative risk stratification in patients undergoing liver transplantation. *Eur J Radiol* 2012; **81**: 2260–4
- 30 Rosario MA, Lima JJ, Parga JR, et al. Coronary calcium score as predictor of stenosis and events in pretransplant renal chronic failure. *Arq Bras Cardiol* 2010; **94**: 236–43
- 31 Jeevarethinam A, Venuraju S, Dumo A, et al. 149 Relationship between coronary artery calcification (CAC) and carotid atherosclerosis in asymptomatic diabetes: a prospective study. *Heart* 2014; **100**(Suppl. 3): A87

Handling editor: J. P. Thompson
